# Supplementary material for: Multiproxy evidence of the Neoglacial expansion of Atlantic Water to eastern Svalbard
Source: Copernicus journal article supplement (doi:10.5194/cp-16-487-2020), 2020-03-10
Supplement: Supplementary file 1 [file cp-16-487-2020-supplement.zip]

Archive with 7 entries (7 files):
- Table S1.xlsx
- cp-16-487-2020-supplement-title-page.pdf
- Supplementary figure 2.cdr
- Supplementary figure_3.cdr
- Table S2.xlsx
- Supplementary figure 1.cdr
- Table S3.xlsx
