# Supplementary material for: Multiproxy evidence of the Neoglacial expansion of Atlantic Water to eastern Svalbard
Source: Copernicus journal article supplement (doi:10.5194/cp-16-487-2020), 2020-03-10
Supplement: Supplementary file 1 [file cp-16-487-2020-supplement.zip › cp-16-487-2020-supplement-title-page.pdf]

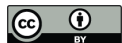

## *Supplement of*

# **Multiproxy evidence of the Neoglacial expansion of Atlantic Water to eastern Svalbard**

**Joanna Pawłowska et al.**

*Correspondence to:* Joanna Pawłowska ([pawlowska@iopan.pl](mailto:pawlowska@iopan.pl))

- [cp-16-487-2020-supplement-title-page.pdf](#)
- [Supplementary figure 1.cdr](#)
- [Supplementary figure 2.cdr](#)
- [Supplementary figure\\_3.cdr](#)
- [Table S1.xlsx](#)
- [Table S2.xlsx](#)
- [Table S3.xlsx](#)

The copyright of individual parts of the supplement might differ from the CC BY 4.0 License.
