# Supplementary material for: Multiproxy evidence of the Neoglacial expansion of Atlantic Water to eastern Svalbard
Source: Copernicus journal article supplement (doi:10.5194/cp-16-487-2020), 2020-03-10
Supplement: Supplementary file 1 [file cp-16-487-2020-supplement.zip › Table S1.xlsx]

## Sheet: Testate foraminifera
Taxon	Sediment depth [cm]
	1	3	5	7	9	11	13	15	17	19	21	23	25	27	29	31	33	35	37	39	41	43	45	47	49	51	53	55
Adercotryma glomerata (Brady, 1878)	489.916	282.43	0	365.646	30.2141	258.024	105.792	152.354	144.229	83.4671	67.8682	36.4376	35.9795	44.5906	21.6268	16.1059	0	20.6932	3.11735	13.224	5.47885	0.814067	7.91733	3.88196	23.3835	3.6946	11.3623	5.4655
Ammotium cassis (Parke, 1870)	78.6726	70.6075	36.4104	34.0136	6.47445	18.8798	17.632	15.2354	36.0572	9.63082	10.0545	0	4.90629	4.24673	11.4495	3.5791	0	6.89774	1.55868	2.6448	5.47885	0.814067	0.377016	0.776391	2.0043	0	0	0
Astrononion gallowayi (Loeblich & Tappan, 1953)	0	0	7.28208	8.5034	0	18.8798	8.81601	40.6277	13.5214	0	0	6.07294	1.63543	0	3.8165	10.7373	0	0	3.11735	10.5792	3.28731	0	0	0.776391	0	0	0	0
Bolivina pseudopunctata (Höglund, 1947)	3.57603	0	0	0	0	0	0	0	0	0	0	0	0	0	0	0	0	3.44887	0	0	0	0	0	0	0	0	0	0
Buccella frigida (Cushman, 1921)	42.9123	50.8374	2.42736	127.551	69.0608	207.678	145.464	192.982	85.6357	99.5185	20.1091	24.2917	73.5943	57.3308	38.165	93.0565	82.3291	151.75	67.0231	71.4097	48.2139	5.69847	15.4576	29.5029	45.4309	22.1676	32.4638	7.65169
Bucella tenerrima (Bandy, 1950)	0	0	0	0	0	0	0	0	9.01429	0	0	3.03647	0	0	0	0	0	0	0	0	0	0	1.50806	0.776391	0	0	0	0
Bulimina marginata (d'Orbigny, 1826)	0	0	0	0	0	0	0	0	4.50714	0	0	0	0	0	0	0	0	0	0	0	0	0	0	0	0	0.615767	0	0
Cassidulina reniforme (Norvang, 1945)	143.041	138.391	0	918.367	271.927	862.177	392.312	858.26	572.407	202.247	55.3	127.532	111.209	70.071	73.7857	143.164	157.561	593.206	193.276	370.272	87.6616	47.2159	33.1774	47.3599	120.926	58.4979	176.928	59.0274
Cibicidoies lobatulus (Walker & Jacob, 1798)	46.4883	135.566	157.778	89.2857	84.1678	119.572	127.832	213.295	103.664	70.626	2.51364	33.4011	55.6046	31.8504	21.6268	62.6342	39.7451	155.199	57.671	60.8305	36.1604	9.7688	12.8185	23.2917	25.3878	12.3153	11.3623	6.5586
Cribrostomoides crassimargo (Norman, 1892)	21.4562	19.7701	4.85472	0	6.47445	6.29327	4.408	0	0	6.42055	0	0	0	0	3.8165	0	0	0	1.55868	0	0	0	0	0	0	0	0	0
Denatlina frobusherensis (Loeblich & Tappan, 1953)	0	0	0	0	0	0	0	0	0	0	0	0	0	0	0	0	0	0	0	2.6448	0	1.62813	0	0	0.668101	0	0	0
Dentalina sp.	0	0	0	0	2.15815	0	0	0	18.0286	0	0	0	0	0	0	0	1.41947	3.44887	0	0	0	0	0.377016	0	0	1.23153	3.24638	0
Eggerella advena (Cushman, 1922)	0	0	2.42736	4.2517	0	0	0	0	0	0	0	0	0	0	0	1.78955	0	0	0	0	0	0	0	0	0	0	0	0
Elphidium albiumbilicatum (Weiss, 1954)	3.57603	0	0	0	0	12.5865	0	5.07846	0	0	0	3.03647	0	0	0	0	0	34.4887	0	0	0	0	1.50806	0	0	0	0	0
Elphidium bartletti (Cushman,1933)	3.57603	31.0673	29.1283	4.2517	4.3163	6.29327	13.224	0	9.01429	22.4719	2.51364	0	0	0	1.27217	1.78955	7.09733	24.1421	9.35206	2.6448	10.9577	0.814067	0	0	0	3.07884	22.7247	21.862
Elphidium excavatum (Cushman, 1930)	128.737	8.4729	60.684	34.0136	79.8515	201.385	273.296	137.118	36.0572	32.1027	35.1909	30.3647	21.2606	44.5906	5.08867	26.8432	55.3592	658.734	51.4363	37.0272	31.7773	12.211	8.29434	1.55278	12.6939	18.473	43.8262	22.9551
Elphidium orbiculare (Brady, 1881)	0	0	0	0	2.15815	0	4.408	0	0	0	0	0	1.63543	0	0	0	0	0	0	0	0	0	0	0	0	0	0	0
Elphidium sp.	0	0	0	0	0	0	0	0	0	0	0	0	0	0	0	0	0	0	0	0	0	0	0.377016	0	0	0	1.62319	0
Fissurina marginata (Montagu, 1803)	3.57603	0	0	0	2.15815	12.5865	0	0	0	0	0	0	0	0	0	3.5791	0	0	0	0	2.19154	0	0	0	0	0.615767	1.62319	0
Fissurina sp.	0	0	9.70944	12.7551	0	0	0	25.3923	0	0	0	0	8.17715	0	0	3.5791	0	0	1.55868	0	0	0	0	0	2.0043	0.615767	0	0
Glandulina laevigata (d'Orbigny, 1846)	0	11.2972	0	0	0	0	0	0	0	0	0	0	0	0	0	0	0	0	0	0	0	0	0	0	0	0	0	0
Globigerina spp	0	2.8243	4.85472	4.2517	2.15815	0	0	0	0	0	0	0	0	0	0	0	0	3.44887	0	2.6448	1.09577	0	0	0	0	0.615767	0	0
Globobulimina auriculata (Höglund, 1947)	0	0	7.28208	0	2.15815	0	0	5.07846	0	0	0	3.03647	1.63543	2.12336	1.27217	0	0	0	0	0	1.09577	0.814067	0	0	0	0	0	0
Globobulimina turgida (Bailey, 1851)	0	0	0	12.7551	4.3163	0	0	0	9.01429	9.63082	0	0	0	0	0	0	0	0	0	0	0	0	0	0	0.668101	0	0	0
Islandiella spp	57.2164	76.2561	55.8293	93.5374	88.4841	69.2259	61.7121	132.04	90.1429	77.0465	15.0818	18.2188	21.2606	10.6168	16.5382	41.1596	48.2619	124.159	14.0281	26.448	32.8731	12.211	11.6875	17.0806	25.3878	21.5519	16.2319	8.74479
Lagena gracilis (Williamson, 1848)	0	2.8243	4.85472	0	0	0	0	0	0	0	0	0	0	0	0	0	0	10.3466	0	0	0	0	0	0	0.668101	0	0	0
Melonis barleeanus (Williamson, 1858)	196.681	141.215	223.317	454.932	205.024	258.024	96.9761	355.492	229.864	89.8876	10.0545	45.547	109.574	23.357	35.6207	85.8984	88.0069	593.206	166.778	256.546	116.152	25.2361	25.6371	31.0557	22.0473	33.2514	206.145	125.706
Nonionellina auricula (Heron-Allen & Earland, 1930)	0	0	0	0	2.15815	18.8798	0	0	0	0	0	0	0	0	0	0	0	3.44887	0	2.6448	0	0	0	0	0	1.8473	0	0
Nonionellina labradorica (Brady, 1884)	71.5205	73.4318	131.078	157.313	118.698	182.505	202.768	233.609	135.214	89.8876	45.2455	100.203	32.7086	12.7402	16.5382	34.0014	11.3557	58.6308	29.6149	63.4753	20.8196	9.7688	17.7197	34.1612	33.405	24.0149	51.9421	28.4206
Oolina costata (Williamson, 1958)	0	0	2.42736	0	0	0	0	0	0	0	0	0	0	0	0	0	0	0	0	0	0	0	0	0	0	0	0	0
Pullenia bulloides (d'Orbigny, 1846)	3.57603	0	0	0	0	0	0	0	0	0	0	0	0	0	0	0	0	0	0	0	0	0	0	0	0	0	0	0
Pyrgo williamsoni (Silvestri, 1923)	0	0	0	0	0	6.29327	0	0	0	0	0	0	0	0	0	0	0	0	0	0	0	0	0	0	0	0	0	1.0931
Quinqueloculina seminulum (Linné, 1758)	0	0	0	0	0	0	0	0	0	0	0	0	0	0	0	0	0	0	0	0	0	0	0	0	0	0.615767	0	0
Quinqueloculina stalkeri (Loeblich & Tappan, 1953)	0	0	2.42736	0	0	0	4.408	0	0	0	0	0	0	0	0	0	0	0	0	0	0	0	0	0	0	0	0	0
Recurvoides turbinatus (Brady, 1881)	168.073	16.9458	2.42736	51.0204	32.3722	44.0529	88.1601	55.8631	49.5786	12.8411	35.1909	21.2553	6.54172	21.2336	20.3547	14.3164	7.09733	20.6932	12.4694	15.8688	14.245	20.3517	7.54031	4.65835	23.3835	2.46307	4.86958	2.1862
Reophax scorpiurus (Montfort, 1808)	25.0322	48.0131	38.8378	25.5102	0	0	0	5.07846	0	0	0	24.2917	0	0	15.266	3.5791	0	0	1.55868	0	0	0	1.50806	1.55278	4.67671	1.23153	1.62319	0
Reophax sp.	0	0	0	0	0	25.1731	0	20.3138	27.0429	3.21027	0	0	3.27086	4.24673	0	0	0	3.44887	0	0	5.47885	0	0	0	0	0	0	0
Robertina arctica (d'Orbigny, 1846)	0	5.6486	2.42736	0	0	0	8.81601	5.07846	0	0	0	0	0	0	0	0	0	0	0	0	0	0	0	0	0	0	0	0
Spirillina sp.	0	2.8243	0	0	0	0	0	0	0	0	0	0	0	0	0	0	0	0	0	0	0	0	0	0	0	0	0	0
Spiroplectammina biformis (Parker & Jones, 1865)	264.626	42.3645	48.5472	102.041	0	50.3461	0	40.6277	0	9.63082	0	30.3647	0	74.3177	2.54434	19.685	0	20.6932	0	2.6448	0	5.69847	3.01612	0	16.7025	0	0	0
Spiroplectammina earlandi (Parker, 1952)	35.7603	2.8243	0	25.5102	0	0	0	0	4.50714	0	0	3.03647	0	0	1.27217	5.36865	0	0	0	0	0	0	0	0	0	0	0	0
Spiroplectammina sp.	0	0	0	46.7687	0	0	0	0	0	6.42055	0	0	0	0	1.27217	1.78955	0	0	0	0	5.47885	0.814067	0	0	0	0	1.62319	1.0931
Stainforthia loeblichi (Feyling-Hanssen, 1954)	25.0322	0	0	17.0068	17.2652	37.7596	4.408	45.7062	13.5214	3.21027	5.02727	0	3.27086	0	5.08867	5.36865	2.83893	27.591	0	7.93441	3.28731	0	1.50806	0	6.01291	0	4.86958	3.2793
Stainfrothia schreibersiana (Czjzek, 1848)	0	0	0	0	6.47445	0	0	0	4.50714	0	0	3.03647	0	0	0	1.78955	1.41947	0	0	0	0	0	0	0	0	0	3.24638	0
Stainforthia sp.	0	8.4729	0	0	0	0	0	0	0	0	0	0	0	0	0	0	0	0	4.67603	0	0	0.814067	0	0	0	1.23153	0	0
Trifarina fluens (Todd, 1948)	3.57603	5.6486	0	4.2517	2.15815	0	4.408	20.3138	0	3.21027	0	0	1.63543	2.12336	1.27217	5.36865	2.83893	0	4.67603	0	1.09577	0	0.754031	0.776391	2.0043	0	6.49277	0
Trochammina atlantica (Parker, 1952)	28.6082	28.243	4.85472	12.7551	0	25.1731	0	20.3138	0	6.42055	0	0	0	4.24673	8.90517	1.78955	0	6.89774	0	5.28961	0	1.62813	1.13105	0	2.6724	0	3.24638	0
Trochammina rotaliformis (Heron-Allen & Earland, 1911)	0	2.8243	2.42736	4.2517	0	0	4.408	5.07846	0	0	0	0	0	0	0	0	0	0	0	0	0	0	0	0	1.3362	0.615767	0	0
