# Supplementary material for: Multiproxy evidence of the Neoglacial expansion of Atlantic Water to eastern Svalbard
Source: Copernicus journal article supplement (doi:10.5194/cp-16-487-2020), 2020-03-10
Supplement: Supplementary file 1 [file cp-16-487-2020-supplement.zip › Table S2.xlsx]

## Sheet: Arkusz1
OTU ID	Taxon	Taxon	Sample depth [cm]
			1	4	9	13	17	21	25	29	33	37	41	45
OTU_220	Globigerinida	Globigerinida	0	0	0	0	0	0	0	0	12	0	0	0
OTU_188	Globigerinida	Candeina nitida	0	922	312	0	0	0	140	0	516	0	0	0
OTU_187	Globigerinida	Globigerinita uvula	259	0	0	0	0	0	0	0	0	0	0	0
OTU_172	Globigerinida	Globorotalia classaformis	0	100	344	0	0	0	422	0	0	0	0	0
OTU_104	Globigerinida	Neogloboquadrina pachyderma	74	417	94	253	0	0	297	0	941	0	0	0
OTU_70	Robertinida	Robertina arctica	0	238	0	0	0	1173	0	0	128	0	0	0
OTU_13	Rotaliida	Rotaliida	3091	720	463	0	0	0	3182	0	0	0	4564	0
OTU_201	Rotaliida	Rotaliida	0	0	0	0	11	0	0	0	0	0	0	0
OTU_202	Rotaliida	Rotaliida	0	136	0	0	0	0	0	0	0	0	0	0
OTU_204	Rotaliida	Rotaliida	0	0	0	0	0	0	0	78	0	0	0	0
OTU_205	Rotaliida	Rotaliida	0	155	0	0	0	0	0	0	0	0	0	0
OTU_206	Rotaliida	Rotaliida	1018	0	363	0	0	0	0	0	0	0	0	0
OTU_208	Rotaliida	Rotaliida	0	0	0	0	0	0	70	0	0	0	0	0
OTU_210	Rotaliida	Rotaliida	0	130	0	0	0	0	0	0	28	0	0	0
OTU_211	Rotaliida	Rotaliida	0	0	0	0	0	0	0	0	77	0	0	0
OTU_212	Rotaliida	Rotaliida	0	170	0	0	0	3701	0	0	0	0	0	0
OTU_214	Rotaliida	Rotaliida	388	450	138	143	0	0	3670	0	482	0	0	0
OTU_217	Rotaliida	Rotaliida	931	0	0	0	0	0	0	0	0	0	0	0
OTU_218	Rotaliida	Rotaliida	210	300	0	1081	0	0	1894	0	1013	0	0	0
OTU_219	Rotaliida	Rotaliida	232	8890	24	0	0	0	0	0	0	0	0	0
OTU_222	Rotaliida	Rotaliida	117	0	17	190	0	0	0	0	0	0	0	0
OTU_224	Rotaliida	Rotaliida	947	1036	688	1203	0	0	2664	1060	4050	0	0	0
OTU_227	Rotaliida	Rotaliida	119	499	0	0	0	0	0	65	0	0	0	0
OTU_229	Rotaliida	Rotaliida	3960	792	67	209	227	6990	421	0	0	0	0	0
OTU_230	Rotaliida	Rotaliida	1620	81	163	0	0	0	0	0	0	0	0	0
OTU_231	Rotaliida	Rotaliida	238	0	0	0	0	0	0	0	0	0	0	0
OTU_232	Rotaliida	Rotaliida	0	0	0	890	0	0	0	21	0	10211	0	0
OTU_246	Rotaliida	Rotaliida	0	0	0	0	0	0	0	0	108	0	0	0
OTU_252	Rotaliida	Rotaliida	0	0	0	0	0	0	0	0	0	43	0	0
OTU_148	Rotaliida	Ammonia sp.	618	2186	2331	1352	0	0	3603	65	2798	0	14	0
OTU_203	Rotaliida	Bolivina sp.	120	0	0	502	0	0	0	0	0	0	0	0
OTU_199	Rotaliida	Bolivina sp.	155	0	0	0	0	0	0	0	0	0	0	0
OTU_186	Rotaliida	Bulimina marginata	0	0	0	57	0	0	0	0	0	0	0	0
OTU_111	Rotaliida	Cassidulina laevigata	16	0	0	0	0	0	0	0	0	0	0	0
OTU_236	Rotaliida	Cassidulina sp.	0	0	0	0	135	0	0	0	0	0	0	0
OTU_237	Rotaliida	Cassidulina sp.	0	0	28	0	661	0	0	0	0	0	0	0
OTU_112	Rotaliida	Cassidulina sp.	0	0	0	0	30	0	0	0	0	0	0	0
OTU_178	Rotaliida	Elphidium aculeatum	0	0	0	0	0	0	679	0	0	0	0	0
OTU_38	Rotaliida	Elphidium excavatum	75	0	0	0	0	0	0	0	0	0	0	0
OTU_39	Rotaliida	Elphidium excavatum	6869	2357	54	998	6161	0	2559	0	79	0	12817	238956
OTU_76	Rotaliida	Epistominella exigua	252	421	0	0	0	0	0	0	0	0	5802	0
OTU_73	Rotaliida	Epistominella sp.	47	0	0	0	0	0	0	0	0	0	0	0
OTU_175	Rotaliida	Gallitellia vivans	0	367	0	0	0	0	0	0	0	0	0	0
OTU_235	Rotaliida	Globocassidulina sp.	392	0	0	0	0	0	0	0	0	0	0	0
OTU_174	Rotaliida	Islandiella sp.	47	0	0	0	0	0	0	0	0	0	0	0
OTU_14	Rotaliida	Melonis affinis	387	0	0	0	0	0	0	0	0	0	11642	0
OTU_29	Rotaliida	Nonionellina labradorica	311	0	241	0	0	0	541	0	0	0	0	0
OTU_28	Rotaliida	Nonionellina sp.	1564	745	395	2284	0	0	2014	712	24751	0	0	0
OTU_181	Rotaliida	Oridorsalis umbonatus	0	0	0	0	0	0	19	0	0	0	0	0
OTU_108	Rotaliida	Protelphidium asklundi	0	0	0	357	0	0	0	0	0	0	0	0
OTU_107	Rotaliida	Protelphidium asklundi	0	223	0	0	0	0	0	0	0	0	0	0
OTU_86	Rotaliida	Pullenia subcarinata	199	0	0	0	0	0	28	0	0	0	0	0
OTU_30	Rotaliida	Rosalina sp.	0	190	0	85	0	0	0	0	0	0	13878	0
OTU_91	Rotaliida	Stainforthia sp.	7970	1548	369	112	12619	3692	260	95	617	0	0	0
OTU_200	Textulariida	Textulariida	38	0	0	0	0	0	0	0	0	0	0	0
OTU_207	Textulariida	Textulariida	0	0	0	395	0	0	0	0	0	0	0	0
OTU_213	Textulariida	Textulariida	153	0	0	0	0	0	0	0	0	0	0	0
OTU_215	Textulariida	Textulariida	57	0	0	0	0	0	479	0	0	0	0	0
OTU_216	Textulariida	Textulariida	0	0	21	0	741	0	0	0	0	0	0	0
OTU_221	Textulariida	Textulariida	165	0	0	0	0	0	0	0	0	0	0	0
OTU_223	Textulariida	Textulariida	17217	6461	64	153	0	777	13	0	0	0	0	0
OTU_225	Textulariida	Textulariida	324	751	1121	874	0	0	494	227	4314	0	0	0
OTU_226	Textulariida	Textulariida	376	611	148	726	4089	12811	141	0	14	10439	0	0
OTU_228	Textulariida	Textulariida	0	30	0	0	0	0	0	57	0	0	0	0
OTU_233	Textulariida	Textulariida	38	205	264	0	0	0	0	12	329	0	0	0
OTU_26	Textulariida	Cribrostomoides crassimargo	0	82	0	34	1004	2942	395	0	0	17781	0	0
OTU_60	Textulariida	Reophax sp.	0	0	12	0	0	0	0	0	0	0	0	0
OTU_58	Textulariida	Reophax sp.	1534	0	429	733	484	0	279	0	0	0	0	0
OTU_62	Textulariida	Reophax subfusiformis	545	197	50	0	1656	0	40	0	0	0	0	0
OTU_48	Textulariida	Spiroplectammina sp.	628	1801	0	0	0	221	69	0	0	0	0	0
OTU_57	Monothalamea	Monothalamea	0	57	0	0	0	0	0	0	0	0	0	0
OTU_59	Monothalamea	Monothalamea	0	126	0	48	0	0	0	0	0	0	0	0
OTU_61	Monothalamea	Monothalamea	0	162	0	0	0	0	0	0	0	0	0	0
OTU_64	Monothalamea	Monothalamea	53	0	43	79	0	0	169	0	1079	0	0	0
OTU_74	Monothalamea	Monothalamea	0	0	0	0	0	57	0	0	0	0	0	0
OTU_75	Monothalamea	Monothalamea	5245	832	751	0	3750	6235	2148	0	0	0	14651	0
OTU_77	Monothalamea	Monothalamea	0	0	310	0	0	0	0	0	0	0	0	0
OTU_109	Monothalamea	Monothalamea	0	35	0	0	0	0	0	0	0	0	0	0
OTU_116	Monothalamea	Monothalamea	0	0	43	93	0	0	0	0	0	0	0	0
OTU_117	Monothalamea	Monothalamea	0	0	0	0	0	0	129	0	0	0	0	0
OTU_118	Monothalamea	Monothalamea	0	60	0	0	0	0	0	0	0	0	0	0
OTU_119	Monothalamea	Monothalamea	104	0	0	0	0	0	0	0	0	0	0	0
OTU_120	Monothalamea	Monothalamea	46	0	0	0	0	0	0	0	0	0	0	0
OTU_121	Monothalamea	Monothalamea	0	0	0	0	0	0	0	0	131	0	0	0
OTU_122	Monothalamea	Monothalamea	26	0	45	0	0	0	0	0	0	0	0	0
OTU_124	Monothalamea	Monothalamea	0	0	0	349	0	0	287	0	0	0	0	0
OTU_125	Monothalamea	Monothalamea	0	0	0	0	0	0	74	0	0	0	0	0
OTU_126	Monothalamea	Monothalamea	0	0	0	0	302	0	0	0	0	0	0	0
OTU_127	Monothalamea	Monothalamea	0	68	26	193	0	0	0	83	1466	0	0	0
OTU_128	Monothalamea	Monothalamea	0	0	0	0	0	0	0	0	0	0	0	11
OTU_129	Monothalamea	Monothalamea	63	0	0	0	0	0	0	0	0	0	0	0
OTU_130	Monothalamea	Monothalamea	0	0	0	0	11	0	0	0	0	0	0	0
OTU_131	Monothalamea	Monothalamea	0	0	0	0	0	0	48	0	0	0	0	0
OTU_132	Monothalamea	Monothalamea	0	0	0	0	0	0	0	0	386	0	0	0
OTU_133	Monothalamea	Monothalamea	117	0	0	0	0	0	59	0	205	8502	0	0
OTU_134	Monothalamea	Monothalamea	325	0	0	0	0	0	0	0	0	0	0	0
OTU_135	Monothalamea	Monothalamea	649	18	11	18	0	0	0	0	0	0	0	0
OTU_136	Monothalamea	Monothalamea	0	359	0	0	0	0	0	0	0	0	0	0
OTU_137	Monothalamea	Monothalamea	125	0	0	0	0	0	0	0	0	0	0	0
OTU_138	Monothalamea	Monothalamea	0	0	0	0	0	0	0	0	1994	0	0	0
OTU_139	Monothalamea	Monothalamea	47	0	0	0	0	0	0	0	0	0	0	0
OTU_140	Monothalamea	Monothalamea	0	0	0	17	0	0	0	0	0	0	0	0
OTU_141	Monothalamea	Monothalamea	0	0	0	0	0	16	0	0	0	0	0	0
OTU_142	Monothalamea	Monothalamea	0	77	1308	444	0	0	537	0	1999	0	0	0
OTU_144	Monothalamea	Monothalamea	0	0	0	0	0	0	0	0	38	0	0	0
OTU_145	Monothalamea	Monothalamea	0	0	0	0	0	0	0	0	0	0	5741	0
OTU_146	Monothalamea	Monothalamea	0	0	473	0	0	0	0	0	0	0	0	0
OTU_147	Monothalamea	Monothalamea	0	71	14	0	0	0	0	0	0	0	0	0
OTU_149	Monothalamea	Monothalamea	242	674	0	497	0	0	0	0	0	0	0	0
OTU_150	Monothalamea	Monothalamea	0	0	0	0	0	0	0	0	0	53	0	0
OTU_151	Monothalamea	Monothalamea	144	96	0	255	0	0	0	0	0	0	0	0
OTU_152	Monothalamea	Monothalamea	117	659	36	0	0	0	0	0	0	0	0	0
OTU_153	Monothalamea	Monothalamea	204	0	0	836	0	0	0	0	832	0	0	0
OTU_154	Monothalamea	Monothalamea	3790	1134	370	647	0	0	5610	0	0	0	0	0
OTU_155	Monothalamea	Monothalamea	0	89	0	0	4081	0	224	0	0	0	0	0
OTU_156	Monothalamea	Monothalamea	0	0	0	0	45	28	0	0	0	350	0	0
OTU_157	Monothalamea	Monothalamea	93	635	2565	1931	1103	0	1305	570	0	0	0	0
OTU_158	Monothalamea	Monothalamea	59	0	0	0	0	0	0	225	0	0	0	0
OTU_159	Monothalamea	Monothalamea	851	876	339	19	0	0	509	347	0	0	0	0
OTU_160	Monothalamea	Monothalamea	0	0	166	0	0	0	80	0	12	0	11	0
OTU_161	Monothalamea	Monothalamea	262	0	155	415	0	0	0	0	0	0	0	0
OTU_162	Monothalamea	Monothalamea	0	0	0	0	0	0	34	0	0	0	16	0
OTU_163	Monothalamea	Monothalamea	22	0	0	0	0	0	0	0	0	11	0	0
OTU_164	Monothalamea	Monothalamea	0	0	27	0	0	0	0	0	0	0	0	0
OTU_165	Monothalamea	Monothalamea	0	33	0	0	0	0	0	0	0	0	0	0
OTU_166	Monothalamea	Monothalamea	515	3096	1297	2020	0	0	3549	1112	3139	0	155	0
OTU_253	Monothalamea	Monothalamea	0	0	0	555	11	51	0	0	16	0	0	0
OTU_18	Monothalamea	Clade A allogromiid	198	97	0	0	0	0	437	0	0	0	0	0
OTU_21	Monothalamea	Clade A allogromiid	0	0	0	0	0	8078	0	0	0	0	0	0
OTU_190	Monothalamea	Clade A allogromiid	0	0	0	0	0	13	0	0	0	0	0	0
OTU_191	Monothalamea	Clade A allogromiid	97	550	134	204	15388	1566	132	0	0	3878	87	550
OTU_22	Monothalamea	Clade A allogromiid	134	545	86	104	1142	3779	435	0	0	0	12	0
OTU_19	Monothalamea	Clade A allogromiid	0	0	0	0	0	0	0	0	107	0	0	0
OTU_20	Monothalamea	Clade A allogromiid	20	0	0	0	1035	0	0	0	0	2056	5064	0
OTU_36	Monothalamea	Clade B Bowseria sp.	18	0	0	0	0	0	0	0	0	0	0	0
OTU_37	Monothalamea	Clade B Bowseria sp.	0	0	0	0	0	0	0	0	0	6766	0	0
OTU_51	Monothalamea	Clade B monothalamid	0	148	0	153	0	0	0	0	0	18366	0	0
OTU_52	Monothalamea	Clade B Pelosina variabilis	0	675	0	147	0	304	0	0	44	0	0	0
OTU_180	Monothalamea	Clade B Psammosphaera sp.	0	0	0	0	0	0	0	0	13	0	0	0
OTU_47	Monothalamea	Clade BM Bathysiphon argenteus	66	0	0	74	0	0	0	0	0	0	0	0
OTU_31	Monothalamea	Clade BM Micrometula sp.	71	0	0	0	0	0	0	0	0	0	0	0
OTU_33	Monothalamea	Clade BM Micrometula sp.	38	0	0	328	0	0	112	0	0	0	0	0
OTU_34	Monothalamea	Clade BM Micrometula sp.	3997	6395	1012	896	7692	60388	17983	852	464	16900	6697	7828
OTU_32	Monothalamea	Clade BM Micrometula sp.	0	0	0	451	0	0	0	0	0	0	0	0
OTU_41	Monothalamea	Clade C Cylindrogullmia alba	246	0	0	230	0	0	0	40	359	0	0	0
OTU_42	Monothalamea	Clade C Cylindrogullmia alba	0	0	0	0	0	0	0	0	15	0	0	0
OTU_43	Monothalamea	Clade C Cylindrogullmia sp.	0	0	0	0	0	26580	0	0	0	0	0	0
OTU_89	Monothalamea	Clade C Cylindrogullmia sp.	87	665	0	43	0	0	97	0	254	0	0	0
OTU_169	Monothalamea	Clade C Gloiogullmia sp.	11	48	0	0	0	1377	0	16	0	0	0	0
OTU_171	Monothalamea	Clade C Pilulina argentea	0	278	0	0	0	0	0	0	0	0	0	0
OTU_173	Monothalamea	Clade C saccaminid	292	0	187	3140	0	0	69	0	1263	0	0	0
OTU_167	Monothalamea	Clade C saccaminid	674	342	247	797	0	0	297	0	2780	0	0	0
OTU_65	Monothalamea	Clade C Toxisarcon sp.	96	0	0	443	0	0	129	0	0	0	0	7357
OTU_68	Monothalamea	Clade C Xenophyophore	0	0	0	0	0	0	0	0	204	0	0	0
OTU_69	Monothalamea	Clade C Xenophyophore	98	0	58	0	0	0	35	0	1311	0	0	0
OTU_106	Monothalamea	Clade CX	92	0	0	0	0	0	0	0	0	0	0	0
OTU_176	Monothalamea	Clade D	0	0	0	49	0	0	0	120	0	0	0	0
OTU_81	Monothalamea	Clade D	206	1220	0	0	1266	11574	320	0	156	0	0	0
OTU_82	Monothalamea	Clade D	4240	1777	1423	1249	0	0	0	0	232	0	0	0
OTU_177	Monothalamea	Clade D environmental foraminiferal sequence	0	0	0	0	0	0	0	0	880	0	0	0
OTU_85	Monothalamea	Clade D Hippocrepinella hirudinea	54	472	0	0	0	0	420	0	0	0	0	0
OTU_84	Monothalamea	Clade D Hippocrepinella hirudinea	27	0	0	0	3110	24	0	0	0	0	52	0
OTU_40	Monothalamea	Clade E Ovammina sp.	350	0	0	313	4228	7015	37	0	0	0	0	0
OTU_66	Monothalamea	Clade E Psammophaga crystallifera	99	0	19	0	0	0	0	0	0	0	0	0
OTU_67	Monothalamea	Clade E Psammophaga sp.	474	0	0	0	0	0	47	0	0	0	0	0
OTU_110	Monothalamea	Clade E saccaminid	0	71	0	0	0	0	0	0	101	0	0	0
OTU_100	Monothalamea	Clade G Ammodiscus sp.	0	0	0	14	0	0	0	0	0	0	0	0
OTU_24	Monothalamea	Clade G Nemogullmia sp.	0	0	0	0	0	0	0	0	0	0	15	0
OTU_25	Monothalamea	Clade G Nemogullmia sp.	0	474	89	0	3973	0	0	0	0	0	0	0
OTU_16	Monothalamea	Clade G Shepheardella sp.	116	0	22	2571	1088	0	1877	0	2730	0	0	0
OTU_17	Monothalamea	Clade G Shepheardella sp.	0	79	124	0	3980	28941	0	0	0	0	0	0
OTU_15	Monothalamea	Clade G Shepheardella sp.	0	570	0	0	0	0	166	0	0	0	0	0
OTU_189	Monothalamea	Clade G Tinogullmia sp.	0	169	0	0	0	0	0	0	0	0	0	0
OTU_105	Monothalamea	Clade I	0	0	23	922	0	0	66	0	0	0	0	0
OTU_184	Monothalamea	Clade I allogromiid sp.	0	0	0	0	0	0	0	0	0	69	0	0
OTU_94	Monothalamea	Clade M3	17	0	0	0	0	0	0	0	0	0	0	0
OTU_238	Monothalamea	Clade M3 Xenophyophore	90	0	0	0	1406	0	0	0	0	0	0	0
OTU_23	Monothalamea	Clade O Cedhagenia saltatus	4269	8059	7589	10943	13	0	28903	1555	18771	1651	0	0
OTU_35	Monothalamea	Clade O Ovammina sp.	658	3538	1880	2664	0	0	3668	225	2104	0	0	0
OTU_168	Monothalamea	Clade TIN Tinogullmia sp.	0	0	0	217	0	0	0	0	0	0	0	0
OTU_87	Monothalamea	Clade V environmental foraminiferal sequence	30	0	0	0	0	954	181	0	271	6648	166	0
OTU_88	Monothalamea	Clade V environmental foraminiferal sequence	1149	1306	33	706	7140	0	288	127	1320	0	0	0
OTU_195	Monothalamea	Clade V environmental foraminiferal sequence	273	392	11	79	0	226	0	0	1409	0	14657	0
OTU_102	Monothalamea	Clade V environmental foraminiferal sequence	3916	241	49	35	0	28	0	0	0	0	0	0
OTU_196	Monothalamea	Clade Y allogromiid	15685	15718	10961	23008	5177	3619	38557	5849	44645	0	73	3632
OTU_2	Monothalamea	Clade Y allogromiid	379	0	113	0	0	2127	0	0	81	0	0	0
OTU_3	Monothalamea	Clade Y allogromiid	673	483	0	568	0	0	1149	0	18	0	0	0
OTU_170	Monothalamea	Clade Y allogromiid	1317	453	116	389	0	0	247	0	2108	1770	0	0
OTU_197	Monothalamea	Clade Y Hipocrepinella sp.	12	0	246	27	0	0	85	1438	64	0	0	0
OTU_1	Monothalamea	Clade Y sacaminid	2734	0	0	1815	0	0	2540	232	2002	0	0	0
OTU_198	Monothalamea	Clade Y Tinogullmia sp.	69	1372	0	767	667	4150	135	17	1921	0	4289	31
OTU_78	Monothalamea	CladeM2 Crithionina sp.	0	0	0	0	0	27	0	0	0	0	0	0
OTU_93	Monothalamea	ENFOR1 environmental foraminiferal sequence	0	205	216	110	0	0	0	0	0	0	0	0
OTU_97	Monothalamea	ENFOR1 Hyperammina sp.	317	0	23	0	0	0	0	0	0	0	0	0
OTU_9	Monothalamea	ENFOR2	0	0	0	0	0	0	0	0	0	0	0	21502
OTU_4	Monothalamea	ENFOR2	0	0	29	0	0	0	0	0	0	0	0	0
OTU_10	Monothalamea	ENFOR2 environmental foraminiferal sequence	2246	727	1130	1531	0	0	371	464	8127	0	0	0
OTU_11	Monothalamea	ENFOR2 environmental foraminiferal sequence	17	0	0	0	0	0	262	0	0	0	0	0
OTU_5	Monothalamea	ENFOR2 environmental foraminiferal sequence	0	0	266	0	0	0	0	0	0	0	0	0
OTU_8	Monothalamea	ENFOR2 environmental foraminiferal sequence	1651	1529	1505	1366	0	0	2229	0	20	0	0	0
OTU_7	Monothalamea	ENFOR2 environmental foraminiferal sequence	134	0	196	0	0	0	0	0	0	0	0	0
OTU_12	Monothalamea	ENFOR2 environmental foraminiferal sequence	799	0	152	503	0	0	1946	0	103	0	0	0
OTU_6	Monothalamea	ENFOR2 environmental foraminiferal sequence	0	0	0	266	0	0	0	0	0	0	0	0
OTU_49	Monothalamea	ENFOR2 silversaccam sp.	0	204	0	736	0	0	0	0	0	0	0	0
OTU_192	Monothalamea	ENFOR3 Crithionina sp.	548	1226	1296	920	0	0	0	0	0	0	0	0
OTU_193	Monothalamea	ENFOR3 Crithionina sp.	0	0	42	0	0	0	0	0	0	0	0	0
OTU_83	Monothalamea	ENFOR3 environmental foraminiferal sequence	62	0	376	86	0	0	0	327	0	0	0	0
OTU_194	Monothalamea	ENFOR3 saccaminid	0	0	0	0	0	0	0	0	139	0	0	0
OTU_182	Monothalamea	ENFOR5 Xenophyophore	176	1324	996	216	0	0	0	998	245	0	0	0
OTU_72	Monothalamea	ENFOR6 Nemogullmia longevariabilis	848	5951	1404	1739	0	0	9610	651	2114	0	0	0
OTU_71	Monothalamea	ENFOR6 Nemogullmia longevariabilis	56	0	0	0	0	0	0	0	0	0	0	0
OTU_54	Monothalamea	ENFOR6 Xenophyophore	0	0	0	0	0	0	112	0	0	0	0	0
OTU_90	Monothalamea	ENFOR7 Crithionina sp.	252	0	0	0	0	0	138	0	0	0	0	0
OTU_113	Monothalamea	ENFOR8	0	0	43	0	0	0	0	0	0	0	0	0
OTU_114	Monothalamea	ENFOR8	203	0	0	0	0	0	0	0	0	0	0	0
OTU_115	Monothalamea	ENFOR8 environmental foraminiferal sequence	0	0	227	0	0	0	0	0	0	0	0	0
OTU_183	Monothalamea	ENFOR8 Hyperammina sp.	261	154	0	0	0	0	0	0	0	0	0	0
OTU_80	Monothalamea	ENFOR9 environmental foraminiferal sequence	933	875	1055	379	0	0	2519	0	340	0	0	0
OTU_79	Monothalamea	ENFOR9 environmental foraminiferal sequence	0	0	125	739	0	0	0	0	0	0	0	0
OTU_185	Monothalamea	Group1 environmental foraminiferal sequence	0	0	0	102	0	0	0	0	0	0	0	0
OTU_50	Monothalamea	Group3 environmental foraminiferal sequence	0	124	0	0	0	0	15	0	0	0	0	0
OTU_99	Monothalamea	undetermined environmental foraminiferal sequence	163	0	36	43	0	0	0	0	0	4942	0	0
OTU_103	Monothalamea	undetermined environmental foraminiferal sequence	14	0	0	0	0	0	34	0	19	0	13	0
OTU_98	Monothalamea	undetermined Monothalamid	270	0	0	0	0	0	0	0	0	0	0	0
OTU_44	Monothalamea	undetermined Monothalamid	92	0	52	86	0	0	0	0	120	0	0	0
OTU_45	Monothalamea	undetermined Monothalamid	70	0	0	0	0	0	0	0	0	0	0	0
OTU_46	Monothalamea	undetermined Monothalamid	235	159	393	0	197	0	19	0	0	0	0	0
OTU_248	Miliolida	Miliolida	0	0	32	0	0	0	0	0	0	0	0	0
OTU_179	Miliolida	Cornuspira antarctica	27	0	0	0	12	0	0	0	0	0	0	0
OTU_239	Miliolida	Hauerinidae	134	158	0	0	0	0	0	0	0	0	0	0
OTU_101	Miliolida	Miliammina sp.	0	0	0	0	0	0	146	0	0	0	0	0
OTU_55	Miliolida	Pyrgo sp.	0	41	0	0	40	14	0	0	0	0	0	0
OTU_95	Miliolida	Spirophtalmidium sp.	67	0	0	0	0	0	0	0	0	605	0	0
OTU_234	Miliolida	Triloculina sp.	0	0	0	0	0	0	0	0	0	24	0	0
OTU_240		Unassigned foraminifera	425	0	0	0	0	0	0	0	0	0	0	0
OTU_241		Unassigned foraminifera	0	0	0	145	0	0	0	164	0	0	0	0
OTU_242		Unassigned foraminifera	157	0	48	0	0	0	0	0	0	0	0	0
OTU_243		Unassigned foraminifera	1617	1757	1760	1450	0	0	1268	711	5385	0	0	0
OTU_244		Unassigned foraminifera	170	214	16	410	0	0	702	178	999	0	0	0
OTU_245		Unassigned foraminifera	8338	1232	1876	0	0	0	0	56	0	0	0	0
OTU_247		Unassigned foraminifera	639	0	0	0	0	0	0	0	0	0	0	0
OTU_249		Unassigned foraminifera	133	0	0	90	0	0	0	0	0	0	0	0
OTU_250		Unassigned foraminifera	30	0	0	0	0	0	0	0	0	0	0	0
OTU_251		Unassigned foraminifera	1516	0	0	0	0	0	0	0	0	0	0	0
OTU_255		Unassigned foraminifera	0	0	335	57	0	0	165	0	1282	0	0	0
OTU_256		Unassigned foraminifera	0	0	11	0	0	0	0	0	0	0	3599	0
OTU_257		Unassigned foraminifera	0	150	0	54	0	0	50	402	0	0	0	0
OTU_258		Unassigned foraminifera	0	0	0	0	0	0	0	0	163	0	0	0
OTU_259		Unassigned foraminifera	0	223	0	866	0	0	0	0	0	0	0	0
OTU_260		Unassigned foraminifera	0	0	0	265	0	0	0	0	0	0	0	0
OTU_261		Unassigned foraminifera	0	0	0	0	0	0	237	0	0	0	0	0
OTU_262		Unassigned foraminifera	87	0	0	0	0	0	0	0	0	0	0	0
OTU_263		Unassigned foraminifera	0	0	321	0	0	0	0	0	0	0	0	0
