# Supplementary material for: Multiproxy evidence of the Neoglacial expansion of Atlantic Water to eastern Svalbard
Source: Copernicus journal article supplement (doi:10.5194/cp-16-487-2020), 2020-03-10
Supplement: Supplementary file 1 [file cp-16-487-2020-supplement.zip › Table S3.xlsx]

## Sheet: diatom aDNA sequence reads
OTU_ID	Taxon	Sample depth [cm]
		1	4	9	13	17	21	25	29	33	37	41	45
OTU48	Attheya sp.	275	7	1218	1100	0	0	0	0	444	0	0	0
OTU13	Bacillariophyta	65	4	17	0	0	5130	652	1	6	0	8153	0
OTU32	Bacillariophyta	85	12	1179	0	495	1270	619	0	0	0	3735	0
OTU37	Bacillariophyta	357	28	2849	167	209	0	1	1	0	1928	0	0
OTU36	Bacillariophyta	95	11	612	66	63	2393	135	0	209	0	0	0
OTU73	Bacillariophyta	17	12	0	0	0	0	0	0	1511	0	0	0
OTU107	Bacillariophyta	36	0	142	0	0	498	0	0	0	0	0	0
OTU97	Bacillariophyta	0	0	0	0	0	0	0	0	0	606	0	0
OTU113	Bacillariophyta	0	0	451	0	0	0	0	0	0	0	0	0
OTU154	Bacillariophyta	0	0	263	0	0	0	0	0	0	0	0	0
OTU166	Bacillariophyta	17	1	205	0	0	0	0	0	0	0	0	0
OTU162	Bacillariophyta	0	0	0	0	0	0	0	0	0	192	0	0
OTU189	Bacillariophyta	0	0	190	0	0	0	0	0	0	0	0	0
OTU201	Bacillariophyta	0	0	0	142	0	0	0	0	0	0	0	0
OTU222	Bacillariophyta	2	0	0	0	0	84	0	0	0	0	0	0
OTU243	Bacillariophyta	0	2	6	2	10	0	4	0	19	18	22	0
OTU315	Bacillariophyta	0	0	17	0	3	2	2	0	0	0	57	0
OTU320	Bacillariophyta	0	0	39	0	0	0	0	0	0	25	0	0
OTU281	Bacillariophyta	0	0	1	0	0	7	0	0	0	8	45	0
OTU304	Bacillariophyta	0	0	7	0	21	2	0	0	10	1	0	0
OTU266	Bacillariophyta	0	0	0	0	0	1	0	0	0	0	37	0
OTU641	Bacillariophyta	0	0	1	0	0	1	0	0	0	0	28	0
OTU357	Bacillariophyta	0	0	25	0	0	0	0	0	0	0	0	0
OTU413	Bacillariophyta	0	0	0	0	0	0	0	0	0	0	20	0
OTU401	Bacillariophyta	0	2	3	5	0	0	0	3	0	2	0	4
OTU423	Bacillariophyta	0	0	0	0	0	5	0	0	0	0	14	0
OTU404	Bacillariophyta	18	0	0	0	0	0	0	0	0	0	0	0
OTU439	Bacillariophyta	8	5	0	0	0	4	0	0	0	0	0	0
OTU634	Bacillariophyta	0	0	0	0	0	0	0	0	0	0	17	0
OTU435	Bacillariophyta	0	0	5	0	2	8	0	0	1	0	0	0
OTU526	Bacillariophyta	0	0	0	0	0	0	0	0	0	0	16	0
OTU724	Bacillariophyta	0	0	0	0	2	0	0	0	1	11	0	0
OTU25	Bacillariophyta	0	0	6	0	0	5	1	0	2	0	0	0
OTU521	Bacillariophyta	0	0	0	0	0	0	0	0	1	0	12	0
OTU522	Bacillariophyta	0	0	0	0	0	0	0	0	0	0	11	0
OTU157	Caloneis sp.	0	0	0	296	0	0	0	0	0	0	0	0
OTU577	Chaetoceros socialis	0	12	0	0	0	0	0	0	0	0	0	0
OTU3	Chaetoceros sp.	61085	14502	9748	3787	109	1031	412	490	1630	65	72	27
OTU44	Chaetoceros sp.	244	31	1085	1620	714	121	80	141	0	627	1	0
OTU168	Chaetoceros sp.	97	68	58	29	2	3	2	2	16	0	0	0
OTU275	Chaetoceros sp.	0	2	0	0	0	0	43	0	0	0	0	0
OTU367	Chaetoceros sp.	20	1	4	1	0	0	0	0	0	0	0	0
OTU260	Coscinodiscophyceae	0	0	67	0	2	0	0	0	0	0	0	0
OTU17	Detonula confervacea	3	3	22	0	0	0	0	0	13	0	0	0
OTU164	Eucampia sp.	1	3	0	0	0	23	193	0	1	0	0	0
OTU88	Fragilaria sp.	0	0	0	0	0	0	0	847	0	0	0	0
OTU22	Fragilariopsis cylindrus	189	14	240	0	125	369	0	130	175	732	2	0
OTU21	Fragilariopsis sp.	201	5646	265	1684	57	102	0	415	0	156	0	1132
OTU196	Licmophora juergensii	0	0	0	0	0	0	152	0	0	0	0	0
OTU14	Navicula sp.	118	6	402	0	0	2641	0	0	0	0	5403	10497
OTU9	Navicula sp.	945	6	9079	0	1	600	2	0	6	1	1	0
OTU137	Navicula sp.	0	0	1	330	1	0	0	0	0	0	0	0
OTU150	Navicula sp.	0	0	6	0	0	1	0	0	0	0	75	221
OTU169	Navicula sp.	1	0	60	0	0	1	0	0	0	0	0	0
OTU386	Navicula sp.	0	0	1	0	0	0	0	0	0	0	13	17
OTU510	Navicula sp.	0	0	0	0	0	1	0	0	0	0	24	0
OTU547	Navicula sp.	11	0	0	0	0	0	0	0	0	0	0	0
OTU26	Nitzschia sp.	10	20	924	1	3283	1339	0	0	724	167	0	1
OTU47	Nitzschia sp.	2	0	0	0	2486	0	0	0	0	241	0	0
OTU87	Nitzschia sp.	22	0	359	227	281	156	60	207	0	0	0	0
OTU94	Nitzschia sp.	1	0	0	0	0	0	0	0	0	725	0	0
OTU116	Nitzschia sp.	0	0	0	0	0	416	1	0	0	0	0	0
OTU125	Nitzschia sp.	50	13	64	0	0	235	0	0	0	0	0	0
OTU353	Nitzschia sp.	28	0	0	0	0	0	0	0	0	0	0	0
OTU114	Odontella sp.	4	4	0	208	2	0	0	0	0	0	271	0
OTU19	Pauliella taeniata	19	86	311	1	15	1865	76	490	119	6997	1	0
OTU176	Pauliella taeniata	0	0	1	0	0	4	0	3	0	160	0	0
OTU215	Pauliella taeniata	0	0	0	0	0	0	95	0	0	0	0	0
OTU448	Pauliella taeniata	0	0	0	0	0	0	0	0	0	16	0	0
OTU149	Pleurosigma intermedium	6	0	243	0	0	36	0	0	0	0	0	0
OTU283	Pleurosigma intermedium	3	7	40	0	10	0	0	0	0	0	0	0
OTU683	Pleurosigma intermedium	12	1	0	0	0	0	0	0	0	0	0	0
OTU231	Porosira sp.	4	0	24	24	2	0	10	12	9	0	0	0
OTU486	Pseudo-nitzschia pseudodelicatissima	0	0	0	0	0	0	0	0	3	15	0	0
OTU10	Pseudo-nitzschia sp.	282	2559	4042	2406	2826	3121	2675	207	4192	4368	11022	68
OTU43	Pseudo-nitzschia sp.	16	18	47	0	87	312	515	0	327	2379	0	0
OTU525	Pseudo-nitzschia sp.	1	0	1	0	0	0	0	0	0	10	6	1
OTU635	Pseudo-nitzschia sp.	0	0	0	0	0	0	0	0	0	0	19	0
OTU280	Rhizosolenia setigera	74	0	0	0	0	0	0	0	0	0	0	0
OTU406	Skeletonema sp.	28	0	0	0	0	0	0	0	0	0	0	0
OTU4	Thalassiosira antarctica	769	152	5947	9638	3213	4714	3795	886	3580	5883	24614	5420
OTU101	Thalassiosira antarctica	0	0	43	38	13	2	9	3	34	82	171	120
OTU128	Thalassiosira antarctica	0	0	333	0	0	0	0	0	0	0	0	0
OTU143	Thalassiosira antarctica	0	0	320	0	1	0	0	0	0	0	0	0
OTU247	Thalassiosira antarctica	0	0	4	1	0	1	3	0	5	2	84	2
OTU230	Thalassiosira antarctica	0	0	3	0	0	0	0	0	0	0	30	38
OTU348	Thalassiosira antarctica	0	0	0	0	1	1	0	0	0	4	46	2
OTU295	Thalassiosira antarctica	0	0	9	9	0	0	5	2	5	3	8	1
OTU342	Thalassiosira antarctica	0	0	1	1	0	0	0	0	2	0	34	0
OTU28	Thalassiosira antarctica	0	0	16	0	0	0	0	0	6	0	0	0
OTU349	Thalassiosira antarctica	0	0	2	0	0	1	1	0	0	6	11	0
OTU551	Thalassiosira antarctica	0	0	1	0	0	3	0	0	0	1	11	3
OTU425	Thalassiosira antarctica	0	0	2	0	0	0	1	1	1	0	12	1
OTU561	Thalassiosira antarctica	0	0	0	1	0	0	1	0	0	2	1	8
OTU748	Thalassiosira antarctica	0	0	1	0	1	0	0	0	0	2	1	6
OTU27	Thalassiosira hispida	3699	16	2	1	27	911	11	0	390	0	1	0
OTU185	Thalassiosira hispida	90	2	0	0	11	19	1	0	4	1	1	0
OTU379	Thalassiosira hispida	20	0	0	0	0	0	0	0	0	0	0	0
OTU366	Thalassiosira hispida	13	0	0	0	2	0	0	0	2	0	0	0
OTU1	Thalassiosira sp.	10478	53706	26939	25460	10951	27740	14572	8993	25615	27732	18978	19152
OTU2	Thalassiosira sp.	1105	1343	21360	30204	13946	18951	13213	13603	13272	33175	53065	4387
OTU45	Thalassiosira sp.	47	79	604	641	8	216	673	757	576	174	73	0
OTU68	Thalassiosira sp.	3	0	195	112	52	12	26	61	94	450	465	91
OTU65	Thalassiosira sp.	9	17	169	97	61	32	23	56	149	320	272	332
OTU66	Thalassiosira sp.	0	0	1	1	2	1426	0	0	0	0	0	0
OTU77	Thalassiosira sp.	0	0	1	1224	0	0	0	0	0	0	0	0
OTU72	Thalassiosira sp.	0	0	0	0	1	1156	0	0	0	0	0	0
OTU100	Thalassiosira sp.	1	0	0	0	0	0	0	0	0	0	723	0
OTU102	Thalassiosira sp.	0	0	0	0	0	0	2	0	0	478	0	0
OTU136	Thalassiosira sp.	1	0	0	0	0	0	0	0	0	0	357	0
OTU172	Thalassiosira sp.	0	0	10	8	0	0	8	4	9	11	249	2
OTU187	Thalassiosira sp.	0	0	0	0	0	0	0	0	0	0	208	0
OTU205	Thalassiosira sp.	0	0	0	0	0	0	188	0	1	0	0	0
OTU226	Thalassiosira sp.	1	2	38	32	0	2	17	10	39	27	8	5
OTU191	Thalassiosira sp.	0	0	0	0	0	139	0	0	0	0	0	0
OTU193	Thalassiosira sp.	0	0	0	0	0	0	0	0	0	137	0	0
OTU174	Thalassiosira sp.	0	0	0	0	0	134	0	0	0	0	0	0
OTU263	Thalassiosira sp.	0	0	3	4	1	1	3	0	1	3	116	0
OTU177	Thalassiosira sp.	4	28	16	8	5	8	9	2	19	23	6	2
OTU129	Thalassiosira sp.	0	0	11	0	0	0	0	0	1	0	3	108
OTU203	Thalassiosira sp.	2	5	26	11	2	2	3	7	37	11	6	11
OTU276	Thalassiosira sp.	0	2	14	12	0	1	5	2	15	13	29	9
OTU277	Thalassiosira sp.	0	0	1	2	0	1	0	0	0	22	74	1
OTU244	Thalassiosira sp.	0	0	0	0	0	0	99	0	0	0	0	0
OTU219	Thalassiosira sp.	97	0	0	0	0	0	0	0	0	0	0	0
OTU250	Thalassiosira sp.	1	2	15	4	0	0	7	4	17	14	1	31
OTU213	Thalassiosira sp.	0	0	10	21	2	0	8	12	20	9	10	2
OTU245	Thalassiosira sp.	0	0	0	0	0	0	0	0	0	0	0	83
OTU432	Thalassiosira sp.	0	0	9	8	2	3	1	0	0	32	24	4
OTU294	Thalassiosira sp.	0	5	19	1	4	1	0	1	0	34	2	3
OTU293	Thalassiosira sp.	0	0	0	0	0	0	0	0	55	0	0	0
OTU233	Thalassiosira sp.	0	0	5	1	0	3	0	0	0	0	26	19
OTU325	Thalassiosira sp.	0	0	1	1	0	0	0	0	1	7	40	1
OTU338	Thalassiosira sp.	0	0	0	50	0	0	0	0	0	0	0	0
OTU329	Thalassiosira sp.	1	0	13	7	0	3	1	5	10	3	3	0
OTU351	Thalassiosira sp.	0	43	0	0	0	0	0	0	0	0	0	0
OTU317	Thalassiosira sp.	0	0	0	0	0	0	0	0	0	0	40	0
OTU383	Thalassiosira sp.	0	0	2	0	0	1	1	2	2	1	28	2
OTU310	Thalassiosira sp.	0	0	0	0	3	5	0	0	3	15	6	3
OTU323	Thalassiosira sp.	29	6	0	0	0	0	0	0	0	0	0	0
OTU365	Thalassiosira sp.	0	2	5	8	0	0	1	0	6	3	8	0
OTU394	Thalassiosira sp.	0	0	1	0	2	3	0	0	0	12	6	6
OTU330	Thalassiosira sp.	0	0	0	0	30	0	0	0	0	0	0	0
OTU449	Thalassiosira sp.	0	0	1	0	1	0	0	0	0	10	3	13
OTU427	Thalassiosira sp.	0	27	0	0	0	0	0	0	0	0	0	0
OTU468	Thalassiosira sp.	0	0	1	0	2	0	0	0	0	7	13	4
OTU412	Thalassiosira sp.	0	0	6	2	0	1	1	1	3	1	6	5
OTU395	Thalassiosira sp.	1	0	0	0	0	21	0	0	0	0	0	0
OTU419	Thalassiosira sp.	0	0	20	0	0	0	0	0	0	0	0	0
OTU470	Thalassiosira sp.	3	17	0	0	0	0	0	0	0	0	0	0
OTU324	Thalassiosira sp.	19	0	0	0	0	1	0	0	0	0	0	0
OTU532	Thalassiosira sp.	0	20	0	0	0	0	0	0	0	0	0	0
OTU400	Thalassiosira sp.	0	2	0	0	0	0	0	0	0	1	0	16
OTU399	Thalassiosira sp.	0	0	0	0	0	0	0	0	0	0	0	18
OTU909	Thalassiosira sp.	0	0	0	0	0	0	0	0	0	0	0	18
OTU422	Thalassiosira sp.	0	0	1	3	1	0	4	1	1	1	6	0
OTU410	Thalassiosira sp.	0	0	0	0	0	0	0	0	0	6	12	0
OTU578	Thalassiosira sp.	0	15	0	0	0	0	0	0	0	0	0	1
OTU718	Thalassiosira sp.	0	4	1	0	0	0	0	0	0	3	0	8
OTU278	Thalassiosira sp.	0	0	0	0	0	0	0	0	0	0	0	15
OTU459	Thalassiosira sp.	0	15	0	0	0	0	0	0	0	0	0	0
OTU552	Thalassiosira sp.	0	1	0	1	1	6	0	0	3	0	0	2
OTU869	Thalassiosira sp.	0	0	0	0	0	0	0	0	0	6	0	8
OTU478	Thalassiosira sp.	2	12	0	0	0	0	0	0	0	0	0	0
OTU516	Thalassiosira sp.	0	0	3	2	0	0	0	3	6	0	0	0
OTU650	Thalassiosira sp.	0	13	0	0	0	0	0	0	0	0	0	0
OTU668	Thalassiosira sp.	0	0	3	1	0	0	1	2	0	4	2	0
OTU698	Thalassiosira sp.	0	0	0	1	1	2	3	0	2	0	4	0
OTU6393	Thalassiosira sp.	0	0	0	0	0	0	0	0	0	0	13	0
OTU950	Thalassiosira sp.	0	0	0	0	0	0	0	0	0	0	12	0
OTU600	Thalassiosira sp.	0	0	0	2	1	1	1	1	0	2	2	2
OTU497	Thalassiosira sp.	0	0	1	2	1	1	1	1	3	2	0	0
OTU633	Thalassiosira sp.	0	1	0	0	0	0	0	0	0	6	1	3
OTU859	Thalassiosira sp.	0	0	1	1	2	0	0	0	1	5	1	0
